# Supplementary material for: Effectiveness of interventions aimed at improving physical and psychological outcomes of fall-related injuries in people with dementia: a narrative systematic review
Source: Springer Nature journal article supplement (doi:10.1186/s13643-018-0697-6), 2018-02-20
Supplement: MOESM2 [file 15478334]

## Additional File 2

### Example search strategy from OVID MEDLINE

---

1. exp dementia/
  2. exp Supranuclear Palsy, Progressive/ or exp Hydrocephalus, Normal Pressure/
  3. (Dementia? or Amentia? or Alzheimer\*).ti,ab,hw,kw.
  4. ((Creutzfeldt-Jakob or huntington? or klaver-bucy or lewy-bod\* or (lewy adj2 bod\*)) adj3 (Syndrome or disease or disorder or dementia?)).ti,ab,hw,kw.
  5. ((normal adj2 hydrocephalus) or (supranuclear adj1 palsy) or (picks adj1 (disorder or disease))).ti,ab,hw,kw.
  6. or/1-5
  7. ((Accidental\* adj3 Fall?) or Falls or Fall-related or Fracture? or ((bone? or hip or femur or tibia or arm?) adj3 broken)).mp.
  8. (fall\* adj3 injur\*).mp.
  9. exp fractures, bone/
  10. accidental falls/
  11. or/7-10
  12. exp accident prevention/
  13. (preventi\* or prevent).mp.
  14. intervention?.mp.
  15. exp Rehabilitation/
  16. rehabilitat\*.mp.
  17. exp Nutrition Therapy/
  18. ((nutrition\* or ergonomic or exercise or occupational or physical) adj3 (support\* or therap\*)).mp.
  19. physiotherap\*.mp.
  20. (improv\* adj5 (outcome? or care)).mp.
  21. management.mp.
  22. ((psycho\* or physical\* or mobility) adj5 (outcome? or improv\*)).mp.
  23. (decreas\* adj2 risk?).mp.
  24. ((improv\* or increas\*) adj5 (social\* or participation or independence or activit\* or well?being or QOL or (quality adj2 life))).mp.
  25. exp Activities of Daily Living/
  26. ((multifactorial or multicomponent or multidisciplinary) adj3 (team? or assessment or intervention?)).mp.
  27. recovery.mp.
  28. HRQoL.mp.
  29. or/12-28
  30. 6 and 11 and 29
-
