# Supplementary material for: Effectiveness of interventions aimed at improving physical and psychological outcomes of fall-related injuries in people with dementia: a narrative systematic review
Source: Springer Nature journal article supplement (doi:10.1186/s13643-018-0697-6), 2018-02-20
Supplement: MOESM3 [file 15478334]

## Additional File 3

### Full summary table of interventions utilised in geriatric assessment

|                                     | Study                    |                            |                                   |                        |                            |                         |                          |
|-------------------------------------|--------------------------|----------------------------|-----------------------------------|------------------------|----------------------------|-------------------------|--------------------------|
|                                     | Huusko et al. (2000) [1] | McGilton et al. (2013) [2] | Prieto-Alhambra et al. (2013) [3] | Shaw et al. (2003) [4] | Stenvall et al. (2012) [5] | Watne et al. (2014) [6] | Kennie et al. (1988) [7] |
| <b>Staff<sup>1</sup></b>            |                          |                            |                                   |                        |                            |                         |                          |
| <b>A&amp;E consultants</b>          |                          |                            |                                   | ✓ <sup>2</sup>         |                            |                         |                          |
| <b>Dietician</b>                    |                          |                            |                                   |                        | ✓                          |                         |                          |
| <b>General practitioner (GP)</b>    | ✓                        |                            |                                   | ✓                      |                            |                         | ✓                        |
| <b>Geriatrician</b>                 | ✓                        |                            |                                   |                        | ✓                          | ✓                       | ✓                        |
| <b>Neurologist</b>                  | ✓*                       |                            |                                   |                        |                            |                         |                          |
| <b>Neuropsychologist</b>            | ✓                        |                            |                                   |                        |                            |                         |                          |
| <b>Nurse</b>                        | ✓                        |                            |                                   | ✓                      | ✓                          | ✓                       |                          |
| <b>Nutritionist</b>                 |                          |                            |                                   |                        |                            | ✓*                      |                          |
| <b>Occupational therapist</b>       | ✓                        |                            |                                   | ✓                      | ✓                          | ✓                       | ✓                        |
| <b>Optician/ophthalmologist</b>     |                          |                            |                                   |                        |                            |                         |                          |
| <b>Orthopaedic specialist</b>       |                          |                            |                                   |                        |                            |                         | ✓*                       |
| <b>Pastor</b>                       |                          |                            |                                   |                        |                            |                         |                          |
| <b>Physical medicine consultant</b> | ✓*                       |                            |                                   |                        |                            |                         |                          |
| <b>Physiotherapist</b>              | ✓                        |                            |                                   | ✓                      | ✓                          | ✓                       | ✓                        |
| <b>Psychiatrist</b>                 | ✓*                       |                            |                                   |                        |                            |                         |                          |
| <b>Social worker</b>                | ✓                        |                            |                                   |                        |                            | ✓*                      |                          |
| <b>Speech therapist</b>             |                          |                            |                                   |                        |                            |                         |                          |
| <b>Trauma team</b>                  |                          |                            |                                   |                        |                            |                         |                          |

<sup>1</sup> Comprehensive geriatric assessment requires a team comprising: a doctor/specialist physician, specialist nurse, senior social worker, physiotherapist and occupational therapist

\*These staff may not have been part of the main team but were on call to assist when needed

<sup>2</sup> Assisted with the screening of patients

| <b>Intervention</b>                                 |                |                               |                |                                 |                |                      |                  |
|-----------------------------------------------------|----------------|-------------------------------|----------------|---------------------------------|----------------|----------------------|------------------|
| <b>Site of intervention</b>                         | Geriatric ward | Inpatient rehabilitation unit | Multicentre    | A&E department; patients' homes | Geriatric ward | Acute geriatric ward | Orthopaedic beds |
| <b>Comprehensive Geriatric Assessment (CGA)</b>     |                |                               |                |                                 | ✓              | ✓                    |                  |
| <b>Bedside assessments</b>                          |                | ✓                             |                |                                 |                |                      |                  |
| <b>Case-finding</b>                                 |                |                               |                |                                 |                |                      |                  |
| <b>Daily team meetings</b>                          |                |                               |                |                                 |                | ✓                    |                  |
| <b>Early discharge planning</b>                     | ✓              | ✓                             |                |                                 |                | ✓                    |                  |
| <b>Follow-up assessments</b>                        |                |                               | ✓              |                                 | ✓              | ✓                    |                  |
| <b>HCP<sup>3</sup> Training</b>                     |                | ✓                             |                |                                 |                |                      |                  |
| <b>In-hospital follow-up</b>                        |                |                               |                |                                 |                |                      |                  |
| <b>Multidisciplinary evaluation</b>                 | ✓              |                               |                | ✓                               | ✓              | ✓                    | ✓                |
| <b>Post-discharge home visits</b>                   | ✓              |                               |                | ✓                               | ✓              |                      |                  |
| <b>Pre-discharge home visits</b>                    | ✓ <sup>4</sup> |                               |                |                                 |                |                      |                  |
| <b>Weekly team meetings</b>                         | ✓              |                               |                |                                 | ✓ (X2)         |                      | ✓                |
| <b><u>Domain 1: Physical medical conditions</u></b> |                |                               |                |                                 |                |                      |                  |
| <b>Bladder re-training<sup>4</sup></b>              |                | ✓                             |                |                                 |                |                      |                  |
| <b>Blood transfusion</b>                            |                |                               |                |                                 |                |                      |                  |
| <b>Blood tests</b>                                  |                |                               |                |                                 |                |                      |                  |
| <b>Clinical advice and recommendations</b>          | ✓              |                               |                |                                 |                |                      |                  |
| <b>Correction of physiological disturbances</b>     |                |                               |                |                                 |                | ✓                    |                  |
| <b>Daily oral supplements</b>                       |                |                               | ✓ <sup>5</sup> |                                 |                | ✓                    |                  |
| <b>Decubitus risk</b>                               |                |                               |                |                                 | ✓              |                      |                  |

<sup>3</sup> Health Care Professional

<sup>4</sup> If the team thought it necessary

<sup>5</sup> Calcium, vitamin D

|                                           |   |                |   |   |   |
|-------------------------------------------|---|----------------|---|---|---|
| Drug treatment                            | ✓ |                | ✓ |   |   |
| Elimination                               |   |                |   |   |   |
| Fatigue assessment                        |   |                |   |   |   |
| Fracture prevention                       |   |                |   | ✓ |   |
| Hydration                                 |   |                |   |   |   |
| Medical assessment                        |   |                |   | ✓ |   |
| Nutrition                                 |   |                |   | ✓ | ✓ |
| Optical correction                        |   |                | ✓ |   |   |
| Osteoporosis assessment                   |   |                |   |   | ✓ |
| Pre-operative electrocardiogram           |   |                |   |   |   |
| Pain assessment                           |   |                |   |   | ✓ |
| Pain management <sup>4</sup>              |   | ✓              |   | ✓ | ✓ |
| Radiographs                               |   |                | ✓ |   |   |
| Review of drug regimen                    |   |                |   | ✓ | ✓ |
| Sleep interventions <sup>4</sup>          |   | ✓              |   |   |   |
| Somatic health assessment                 |   |                |   |   |   |
| Speech therapy                            | ✓ |                |   |   |   |
| UTI screening/ treatment                  |   |                |   | ✓ |   |
| <b>Domain 2: Mental health conditions</b> |   |                |   |   |   |
| Anxiety assessment                        |   |                |   |   |   |
| Cognitive assessment                      |   |                |   |   |   |
| Delirium prevention                       |   | ✓              |   | ✓ | ✓ |
| Dementia management                       |   | ✓ <sup>6</sup> |   |   |   |
| Depression assessment                     |   |                |   | ✓ |   |
| Mental health assessment                  |   |                |   |   |   |
| Patient counselling                       | ✓ |                |   |   |   |
| Psychogeriatric assessment                |   |                |   | ✓ |   |
| <b>Domain 3: Functioning</b>              |   |                |   |   |   |
| Daily increase of ambulation              |   | ✓              |   |   |   |

<sup>6</sup> If required, using the REAP model: Relate well, Environment modification, Abilities-focused care, Personhood

|                                                             |                |   |   |   |
|-------------------------------------------------------------|----------------|---|---|---|
| <b>distance using the lowest level of assistance/aids</b>   |                |   |   |   |
| Daily living aids                                           | ✓              |   |   |   |
| Early mobilization and rehabilitation                       | ✓              |   | ✓ | ✓ |
| Evaluation of ADL                                           |                |   | ✓ |   |
| Falls assessment                                            |                |   | ✓ |   |
| Falls prevention                                            |                |   | ✓ |   |
| Family counselling                                          | ✓              |   |   |   |
| Functional assessment                                       |                |   | ✓ |   |
| Help with use of appliances                                 | ✓              |   |   |   |
| Hip range of motion                                         |                | ✓ |   |   |
| Home hazard modification                                    |                |   | ✓ |   |
| Home-based exercise program                                 |                |   | ✓ |   |
| Increasing independence in basic activities of daily living |                | ✓ |   |   |
| Individualised rehabilitation planning                      |                |   |   |   |
| Lower extremity strengthening                               |                | ✓ |   |   |
| Occupational therapy                                        | ✓ <sup>7</sup> | ✓ | ✓ | ✓ |
| Orthotics                                                   |                |   | ✓ | ✓ |
| Physiotherapy                                               | ✓              | ✓ | ✓ | ✓ |
| Training                                                    | ✓              |   |   |   |
| Walking aids                                                | ✓              |   | ✓ |   |
| <b>Domain 4: Social circumstances</b>                       |                |   |   |   |
| Caregiver training                                          |                | ✓ |   |   |
| <b>Social support services</b>                              |                |   |   |   |

<sup>7</sup> Only for patients who would benefit from it

## Supplemental material references

- 1 Huusko TM, Karppi P, Avikainen V, Kautiainen H, Sulkava R. Randomised, clinically controlled trial of intensive geriatric rehabilitation in patients with hip fracture: subgroup analysis of patients with dementia. *BMJ*. 2000;321:1107-11.
- 2 McGilton KS, Davis AM, Naglie G, Mahomed N, Flannery J, Jaglal S, et al. Evaluation of patient-centered rehabilitation model targeting older persons with a hip fracture, including those with cognitive impairment. *BMC Geriatr*. 2013;13:136.
- 3 Prieto-Alhambra D, Judge A, Arden NK, Cooper C, Lyles KW, Javaid MK. Fracture prevention in patients with cognitive impairment presenting with a hip fracture: Secondary analysis of data from the HORIZON Recurrent Fracture Trial. *Osteoporos Int*. 2014;25:77-83.
- 4 Shaw FE, Bond J, Richardson DA, Dawson P, Steen IN, McKeith IG, et al. Multifactorial intervention after a fall in older people with cognitive impairment and dementia presenting to the accident and emergency department: randomised controlled trial. *BMJ*. 2003;326:73.
- 5 Stenvall M, Berggren M, Lundstrom M, Gustafson Y, Olofsson B. A multidisciplinary intervention program improved the outcome after hip fracture for people with dementia-Subgroup analyses of a randomized controlled trial. *Arch Gerontol Geriatr*. 2012;54:e284-e9.
- 6 Watne LO, Torbergsen AC, Conroy S, Engedal K, Frihagen F, Hjorthaug GA, et al. The effect of a pre- and postoperative orthogeriatric service on cognitive function in patients with hip fracture: randomized controlled trial (Oslo Orthogeriatric Trial). *BMC Med*. 2014;12:63.
- 7 Kennie DC, Reid J, Richardson IR, Kiamari AA, Kelt C. Effectiveness of geriatric rehabilitative care after fractures of the proximal femur in elderly women - a randomized clinical-trial. *BMJ*. 1988;297:1083-6.
