# Supplementary material for: Effectiveness of interventions aimed at improving physical and psychological outcomes of fall-related injuries in people with dementia: a narrative systematic review
Source: Springer Nature journal article supplement (doi:10.1186/s13643-018-0697-6), 2018-02-20
Supplement: MOESM4 [file 15478334]

**Risk of Bias assessment within individual studies**

| Author/Year   | Random sequence generation (selection bias) - H/L/U | Support for judgement                                                                                                                        | Allocation concealment (selection bias) - H/L/U | Support for judgement                                                                                                                                                                                                                                | Blinding of participants & personnel (performance bias) - H/L/U | Support for judgement                                                                                  | Blinding of outcome assessment (detection bias) - H/L/U | Support for judgement                                                                                | Incomplete outcome data (attrition bias) - H/L/U | Support for judgement                                                                                                                                                                                                                                           | Selective reporting (reporting bias) - H/L/U | Support for judgement                                                                                                                                           | Other bias - H/L/U | Support for judgement                                                                                                                                                                                                                                                   |
|---------------|-----------------------------------------------------|----------------------------------------------------------------------------------------------------------------------------------------------|-------------------------------------------------|------------------------------------------------------------------------------------------------------------------------------------------------------------------------------------------------------------------------------------------------------|-----------------------------------------------------------------|--------------------------------------------------------------------------------------------------------|---------------------------------------------------------|------------------------------------------------------------------------------------------------------|--------------------------------------------------|-----------------------------------------------------------------------------------------------------------------------------------------------------------------------------------------------------------------------------------------------------------------|----------------------------------------------|-----------------------------------------------------------------------------------------------------------------------------------------------------------------|--------------------|-------------------------------------------------------------------------------------------------------------------------------------------------------------------------------------------------------------------------------------------------------------------------|
| Huusko/2000   | Low                                                 | allocation sequence was computer generated                                                                                                   | Low                                             | and sealed in numbered, opaque envelopes in Helsinki, Finland, by the information technology department of Novartis before the study was started. The envelopes were stored on the orthopaedic ward by the head nurse until patients were randomised | High                                                            | We could not blind the staff doing interventions or assessments.<br><br>Patient blinding not mentioned | High                                                    | We could not blind the staff doing interventions or assessments.                                     | Low                                              | Eleven patients were later excluded because of a violation of the randomisation criteria, three patients withdrew their consent after randomisation, and three patients were excluded because of a protocol violation. A total of 243 patients were followed. O | Unclear                                      | Can't locate a trial register record.                                                                                                                           | n/a                | n/a                                                                                                                                                                                                                                                                     |
| Kennie/1988   | Unclear                                             | Can't access reference<br><br>Patients were allocated in random sequence determined before the start of the study after the method of Tukey. | Low                                             | allocation was in sealed envelopes held by a departmental secretary                                                                                                                                                                                  | High                                                            | No attempt was made to blind either staff or patients to the fact that the trial was being conducted   | High                                                    | No attempt was made to blind either staff or patients to the fact that the trial was being conducted | Unclear                                          | Data reported for 108 in trial                                                                                                                                                                                                                                  | Unclear                                      | Can't locate a trial register record.                                                                                                                           | n/a                | n/a                                                                                                                                                                                                                                                                     |
| McGilton/2013 | High                                                | Not an RCT<br><br>A quasi-experimental design was used to evaluate the PCRM-CI.                                                              | High                                            | Not an RCT<br><br>A quasi-experimental design was used to evaluate the PCRM-CI.                                                                                                                                                                      | High                                                            | there was no blinding of patients, collateral informants, or research assistants.                      | High                                                    | there was no blinding of patients, collateral informants, or research assistants.                    | Low                                              | See additional table provided by McGilton for sub-analysis                                                                                                                                                                                                      | Low                                          | Outcomes reported match outcomes in trial register<br><br><a href="https://clinicaltrials.gov/show/NCT01566136">https://clinicaltrials.gov/show/NCT01566136</a> | High               | n/a<br>the limited sample size provided insufficient power to examine multiple outcomes and interactions among predictors. Third, this study used a quasi-experimental design as it was impossible to randomly assign the patients to the intervention or control group |

|                      |     |                                                                                                                                                                                                                                                                |     |                                                                                                                                                                                                                                                                |      |                                                                                                                                                                                                                                                                       |      |                                                                                                                                                                                                                                                                 |      |                                                                                                                                                                                                                                                                         |         |                                                                                                                          |         |                                                                                                                                            |
|----------------------|-----|----------------------------------------------------------------------------------------------------------------------------------------------------------------------------------------------------------------------------------------------------------------|-----|----------------------------------------------------------------------------------------------------------------------------------------------------------------------------------------------------------------------------------------------------------------|------|-----------------------------------------------------------------------------------------------------------------------------------------------------------------------------------------------------------------------------------------------------------------------|------|-----------------------------------------------------------------------------------------------------------------------------------------------------------------------------------------------------------------------------------------------------------------|------|-------------------------------------------------------------------------------------------------------------------------------------------------------------------------------------------------------------------------------------------------------------------------|---------|--------------------------------------------------------------------------------------------------------------------------|---------|--------------------------------------------------------------------------------------------------------------------------------------------|
| Prieto-Alhambra/2014 | Low | From: Cathleen S. Colón-Emeric, John Caminis, Theodore T. Suh, Carl F. Pieper, Cheri Janning, Jay Magaziner, Jonathan Adachi, Theresa Rosario-Jansen, Peter Mesenbrink, Zeb D. Horowitz & Kenneth W. Lyles (2004) The HORIZON Recurrent Fracture Trial: design | Low | From: Cathleen S. Colón-Emeric, John Caminis, Theodore T. Suh, Carl F. Pieper, Cheri Janning, Jay Magaziner, Jonathan Adachi, Theresa Rosario-Jansen, Peter Mesenbrink, Zeb D. Horowitz & Kenneth W. Lyles (2004) The HORIZON Recurrent Fracture Trial: design | Low  | From: Lyles KW, Colon-Emeric CS, Magaziner JS, Adachi JD, Pieper CF, Mautalen C, Hylstrup L, Recknor C, Nordsletten L, Moore KA, Lavecchia C, Zhang J, Mesenbrink P, Hodgson PK, Abrams K, Orloff JJ, Horowitz Z, Eriksen EF, Boonen S (2007) Zoledronic acid         | Low  | From: Lyles KW, Colon-Emeric CS, Magaziner JS, Adachi JD, Pieper CF, Mautalen C, Hylstrup L, Recknor C, Nordsletten L, Moore KA, Lavecchia C, Zhang J, Mesenbrink P, Hodgson PK, Abrams K, Orloff JJ, Horowitz Z, Eriksen EF, Boonen S (2007) Zoledronic acid   | High | Some patients couldn't be included in sub-analysis due to missing data                                                                                                                                                                                                  | Low     | Outcomes reported match outcomes in published trial protocol                                                             | High    | Some patients couldn't be included in sub-analysis due to missing data                                                                     |
| Shaw/2003            | Low | randomised patients by block randomisation using computer generated random numbers either to assessment plus targeted multifactorial intervention (intervention group) or to assessment plus conventional care (control group).                                | Low | Group allocation was performed by a researcher who was independent of the recruitment process and blind to baseline interview data                                                                                                                             | High | No mention of participant blinding<br><br>Data on secondary outcomes, compliance with intervention, treatment received by control group, and objective effects of intervention, were by necessity recorded and coded by members of the study team, who were not blind | High | Data from the postcards (primary outcome) were processed and coded off site by a researcher who was blind to group allocation and otherwise unconnected with the study. Data on secondary outcomes, compliance with intervention, treatment received by control | Low  | See table 2<br><br>We report on 274 of the 308 patients; data on initial multifactorial assessment or outcome of falls (diary returns) were not obtained on 34 patients who died (n=24) or withdrew (n=10) shortly after recruitment.<br><br>Overall, 88% of diaries we | Unclear | No details in trials register<br><a href="http://www.isrctn.com/ISRCTN66023158">http://www.isrctn.com/ISRCTN66023158</a> | Unclear | there was relative under-recruitment of participants from the community, and recruitment was from a specific population in a single centre |

|               |         |                                                                                                                                                                                                                                                                |     |                                                                                                                                                                                                                                                                |      |                                                                                                                                                                                                                                                                      |      |                                                                                                                                                                                                                                                                      |     |                                                                                                                                                                                                                                                                 |         |                                                                                                                                                                         |         |                                                                                                                                                                                                                                                                  |
|---------------|---------|----------------------------------------------------------------------------------------------------------------------------------------------------------------------------------------------------------------------------------------------------------------|-----|----------------------------------------------------------------------------------------------------------------------------------------------------------------------------------------------------------------------------------------------------------------|------|----------------------------------------------------------------------------------------------------------------------------------------------------------------------------------------------------------------------------------------------------------------------|------|----------------------------------------------------------------------------------------------------------------------------------------------------------------------------------------------------------------------------------------------------------------------|-----|-----------------------------------------------------------------------------------------------------------------------------------------------------------------------------------------------------------------------------------------------------------------|---------|-------------------------------------------------------------------------------------------------------------------------------------------------------------------------|---------|------------------------------------------------------------------------------------------------------------------------------------------------------------------------------------------------------------------------------------------------------------------|
| Stenvall/2012 | Unclear | Doesn't appear to be stated                                                                                                                                                                                                                                    | Low | From: Stenvall, M., Olofsson, B., Lundström, M., Englund, U., Borssen, B., Svensson, O., Nyberg, L., Gustafson, Y., 2007. A multidisciplinary, multifactorial intervention program reduces postoperative falls and injuries after femoral neck fracture. Osteo | High | From: Stenvall, M., Olofsson, B., Lundström, M., Englund, U., Borssen, B., Svensson, O., Nyberg, L., Gustafson, Y., 2007. A multidisciplinary, multifactorial intervention program reduces postoperative falls and injuries after femoral neck fracture. Osteo       | High | Another limitation is that the assessors were not blinded to the allocation group but to minimize the risk of bias a nurse from the orthopedic department carried out the assessments in the intervention group and a nurse from the geriatric department carried    | Low | See figure 1                                                                                                                                                                                                                                                    | Unclear | Can't locate a trial register record.                                                                                                                                   | High    | ...the group studied is small since it is a subgroup analysis. This causes power problems so the results should be interpreted with caution.                                                                                                                     |
| Watne/2014    | Low     | Randomization was based on computer-generated random numbers (blocks of variable and unknown size) and was carried out by a statistician (ES) not involved in the clinical service. Randomization was stratified according to whether or not the patients were | Low | Allocation was by sealed, opaque, numbered envelopes.                                                                                                                                                                                                          | High | As with all service evaluations, blinding of assessments during hospital stay was impossible and may have introduced bias.<br><br>Follow up visits were carried out four and twelve months after surgery (with a time window of ± three weeks) by study nurses blind | Low  | A statistical analysis plan (SAP) was developed (and published online) prior to unblinding of the data [33]. The primary analysis was carried out blind to allocation by the study statistician (ES).<br><br>Follow up visits were carried out four and twelve month | Low | We also carried out sensitivity analyses including the three moribund patients who were erroneously recruited, and a strict intention to treat analysis with all patients analyzed according to allocation. Missing values for the primary outcome were imputed | Low     | Outcomes reported match outcomes in trial register<br><br><a href="https://clinicaltrials.gov/ct2/show/NCT01009268">https://clinicaltrials.gov/ct2/show/NCT01009268</a> | Unclear | Lack of power calculation prior to recruitment - No pre-trial data were available to carry out precise power estimates. Based upon previous experience with the CDR, we judged 300 patients to be sufficient to detect clinically meaningful differences [30]. A |
